# Supplementary material
Source: publisher figshare collection journal article supplement (https://acs.figshare.com/ndownloader/files/16333577)
Supplement: Supplementary file 1 [file 16333577]

## **Supporting Information**

### **Ergosterol-Induced Ordered Phase in Ternary Lipid Mixture Systems of Unsaturated and Saturated Phospholipid Membranes**

#### **Authors**

Tham Thi Bui, Keishi Suga, Hiroshi Umakoshi

#### **Affiliation**

Division of Chemical Engineering, Graduate School of Engineering Science, Osaka University, 1-3  
Machikaneyama-cho, Toyonaka, Osaka 560-8531, Japan

#### **Keywords:**

Ergosterol; phase diagram; membrane fluidity; membrane polarity; Langmuir monolayer; ordered phase.

## Differential scanning calorimetry analysis.

The phase transitions of DOPC/DPPC liposomes were revealed by differential scanning calorimetry (DSC) analysis (**Figure S1**). It was found that the DPPC liposome indicated a phase transition temperature ( $T_m$ ) at 41 °C. The enthalpy ( $\Delta H$ ) for DOPC and DPPC were calculated (Table). In the case of liposome mixture ((1) DOPC liposome + DPPC liposome), the  $\Delta H$  values showed a liner relationship with DPPC concentration. In contrast, the DOPC/DPPC binary mixtures (2) showed the decreased  $\Delta H$  values lower than those of liposome mixtures. It is therefore suggested that DPPC molecules are not fully in solid ordered ( $S_o$ ) phases.

**Table S1** Phase transition enthalpy of DPPC [kcal/mol]

| DOPC/DPPC | $\Delta H_{\text{DOPC+DPPC}}$ (1) | $\Delta H_{\text{DOPC/DPPC}}$ (2) | (2) - (1) |
|-----------|-----------------------------------|-----------------------------------|-----------|
| 10/0      | 0.00                              | 0.00                              | 0.00      |
| 7/3       | 2.54                              | 0.00                              | -2.54     |
| 5/5       | 4.92                              | 0.49                              | -4.43     |
| 3/7       | 5.42                              | 3.55                              | -1.87     |
| 0/10      | 7.38                              | 7.38                              | 0.00      |

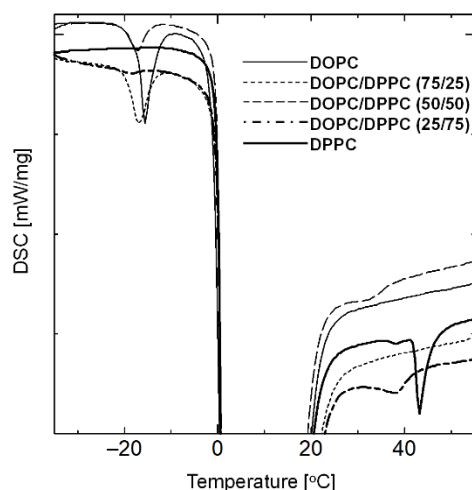

|                   | $\Delta H_{\text{DOPC}}$ | $\Delta H_{\text{DPPC}}$ | $\Delta H_{\text{boundary}}$ |
|-------------------|--------------------------|--------------------------|------------------------------|
| DOPC              | -1.95 J/g                | -                        | 0                            |
| DOPC/DPPC (75/25) | -1.31 J/g (74.1%)        | -                        | -0.45 J/g (25.9%)            |
| DOPC/DPPC (50/50) | -0.64 J/g (40.4%)        | -0.16 J/g (10.1%)        | -0.79 J/g (49.5%)            |
| DOPC/DPPC (25/75) | -0.11 J/g (7.8%)         | -0.51 J/g (36.4%)        | -0.78 J/g (55.8%)            |
| DPPC              | -                        | -1.22 J/g                | 0                            |

$\Delta H_{\text{DOPC}}$  : phase transition enthalpy of DOPC  
 $\Delta H_{\text{DPPC}}$  : phase transition enthalpy of DPPC  
 $\Delta H_{\text{boundary}} = \sum (\Delta H_{\text{DOPC}} + \Delta H_{\text{DPPC}}) - (\Delta H_{\text{DOPC}} + \Delta H_{\text{DPPC}})$

**Figure S1** DSC analysis of DOPC/DPPC liposomes. Based on the obtained  $\Delta H$  values, the fraction of total boundary lipid in DOPC/DPPC 3/1 (75/25), 1/1 (50/50) and 1/3 (25/75) were 25.9%, 49.5%, 55.8%, respectively. The mean boundary DPPC (i.e. not in  $S_o$  state) in DOPC/DPPC 3/1, 1/1 and 1/3 was 25 mol%, 37.8 mol% and 36.0 mol%, respectively.

# Estimation of phase state based on temperature-dependency of $1/P$ values.

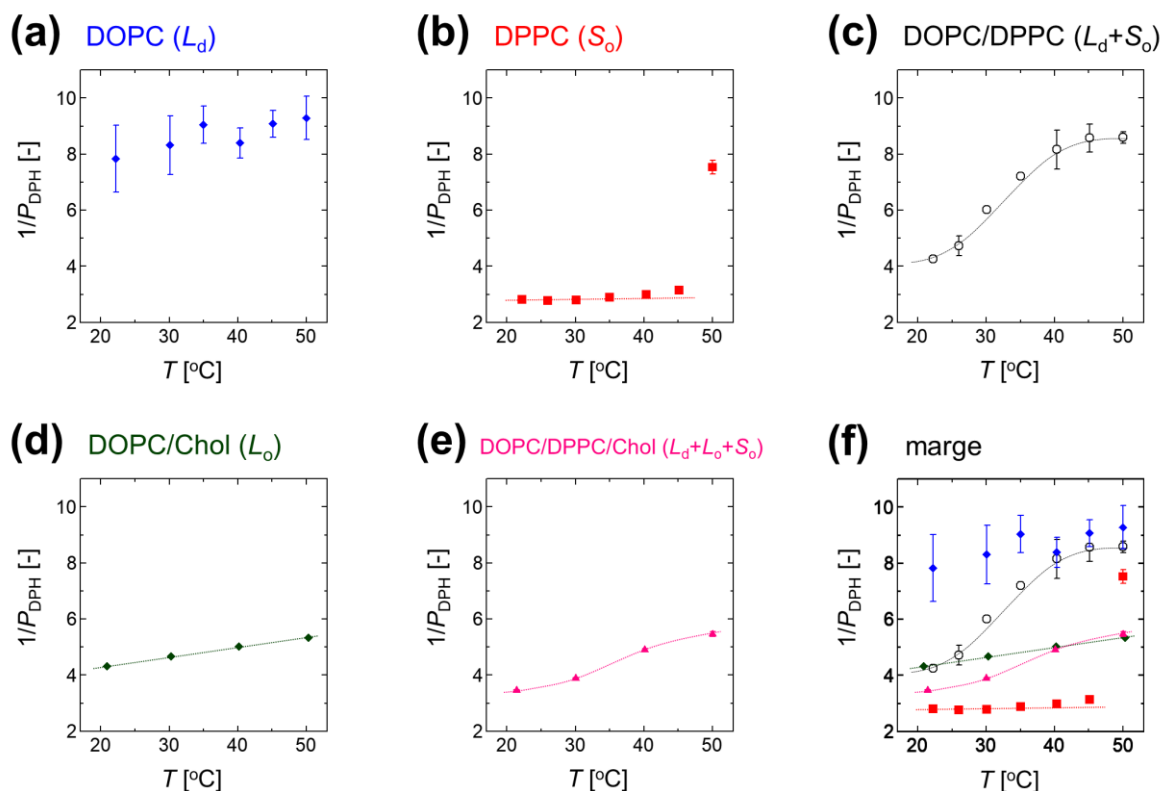

**Figure S2** Temperature dependency of liposomes with different phase states. (a) DOPC,  $L_d$  phase,  $1/P_{\text{DPH}} > 6$ . (b) DPPC,  $S_o$  phase,  $1/P_{\text{DPH}} \sim 3$  (almost constant) below  $T_m$ ;  $1/P_{\text{DPH}} > 6$  above  $T_m$ . (c) DOPC/DPPC 1/1 (no sterol),  $L_d+S_o$  phase,  $T$  vs  $1/P_{\text{DPH}}$  is sigmoidal. (d) DOPC/Chol 1/1,  $L_o$ , phase,  $1/P_{\text{DPH}} < 6$ ,  $T$  vs  $1/P$  is linear. (e) DOPC/DPPC/Chol 2/2/1,  $L_d+L_o+S_o$  phase,  $1/P_{\text{DPH}} < 6$ ,  $T$  vs  $1/P_{\text{DPH}}$  is sigmoidal. (f) merged graph. Data are cited from Suga et al. (Suga, K. et al., *Langmuir* **2013**, 29, 4830-4838).

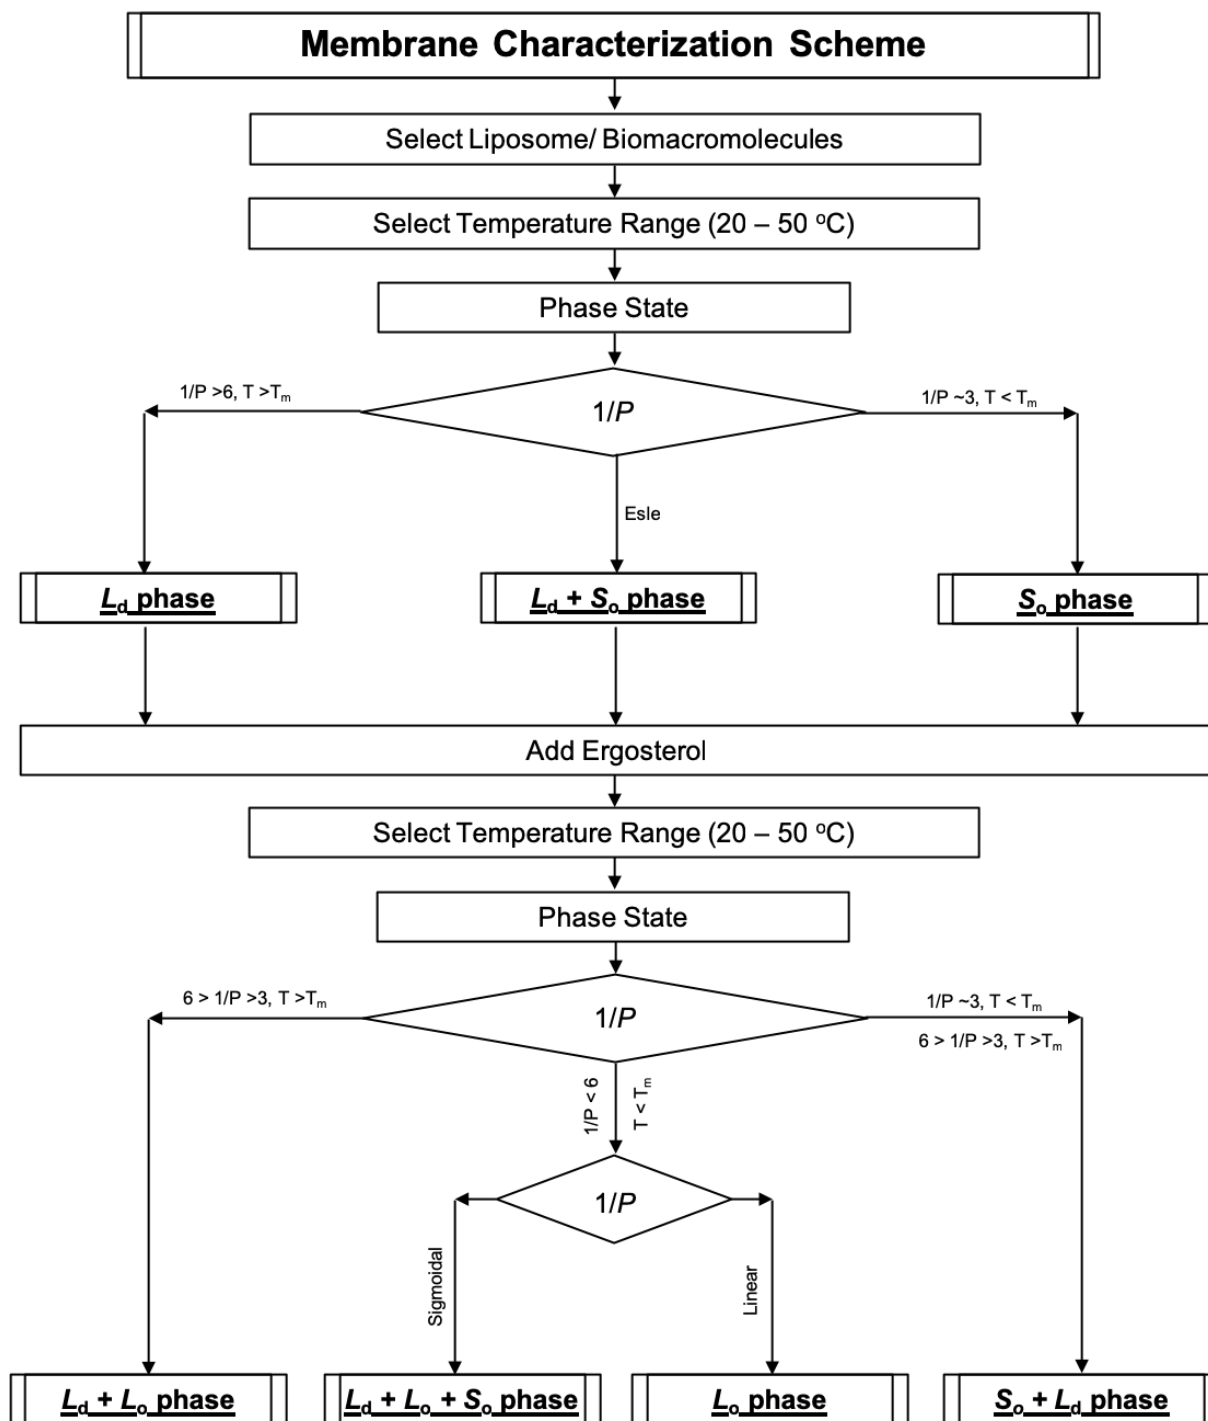

**Figure S3** Scheme for constructing the phase diagram for DOPC/DPPC/Erg ternary mixtures based on membrane fluidity ( $1/P_{DPH}$ ) and the dependence on temperatures. In the absence of Erg, the phase states of the pure or mixed phospholipid membranes was analyzed. When  $T < T_m$  and  $1/P_{DPH} \sim 3$ , it indicated the  $S_o$  phase membrane, and when temperatures increasing over  $T_m$ , and  $1/P_{DPH} > 6$ , this reflected the  $L_d$  phase. If not, membrane phase was  $L_d + S_o$  phase. The addition of Erg can contribute to the membrane phases. For example, the presence of Erg in  $S_o$  resulted in the  $1/P_{DPH} < 6$ , it indicated the mixed phase of  $S_o + L_o$  phase. Furthermore, membrane will be  $L_o$  phase, when  $1/P_{DPH} < 6$ ,  $T$  vs  $1/P_{DPH}$  is linear. While,  $1/P_{DPH} < 6$ ,  $T$  vs  $1/P_{DPH}$  is sigmoidal, the membranes in the  $L_d + S_o + L_o$  phases. Otherwise,  $L_d + L_o$  phase.

# **Cartesian diagram analysis of DOPC/DPPC/Erg ternary lipid mixtures.**

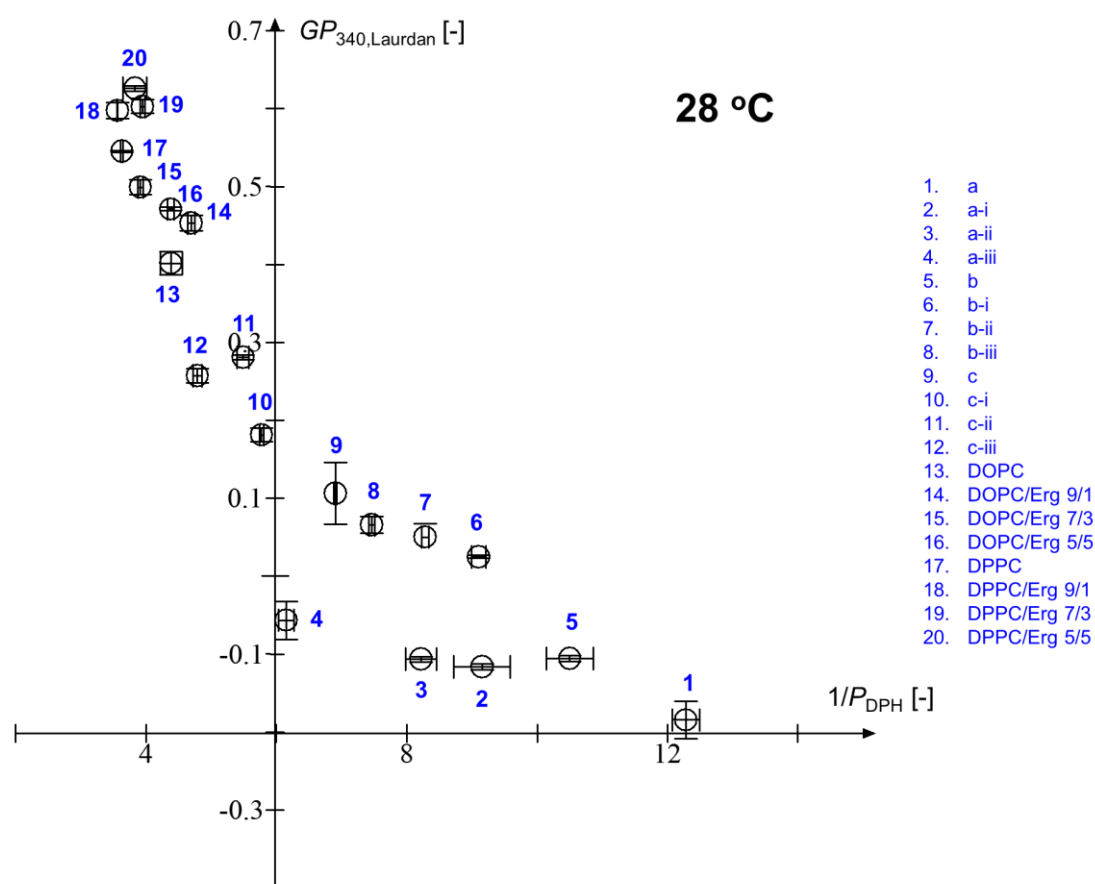

**Figure S4** Cartesian diagram for DOPC/DPPC/Erg ternary mixtures at 28 °C, based on membrane fluidity ( $1/P_{DPH}$ ) and membrane polarity ( $GP_{340,Laurdan}$ ). When the liposome membrane becomes polar ( $GP_{340,Laurdan}$  decrease), its fluidity increases ( $1/P_{DPH}$  increase). The membranes showing high fluidity ( $1/P_{DPH} > 6$ ) and in hydrophilic ( $GP_{340,Laurdan} < 0$ ) are estimated as liquid-disordered phase ( $L_d$ ). For details of Cartesian diagram analysis, see following reports (Suga, K., et al., *Langmuir* **2013**, 29, 1899-1907; Suga, K. et al., *Langmuir* **2013**, 29, 4830-4838; Bui, T. T. et al., *Langmuir* **2016**, 32, 6176-6184).
